# Supplementary material
Source: PubMed Central journal article supplement (PMC3294028)
Supplement: NIHMS345304-supplement-01.pdf [file NIHMS345304-supplement-01.pdf]

# The Rate-Limiting Step in O<sub>2</sub> Reduction by Cytochrome *ba*<sub>3</sub> from *Thermus thermophilus*

Tsuyoshi Egawa<sup>§</sup>, Ying Chen<sup>||</sup>, James A. Fee<sup>||</sup>, Syun-Ru Yeh<sup>§</sup> and Denis L. Rousseau<sup>§\*</sup>.

<sup>§</sup>Department of Physiology and Biophysics, Albert Einstein College of Medicine, Bronx, NY

<sup>||</sup>Department of Molecular Biology, The Scripps Research Institute, La Jolla, 92037 CA.

## Supplementary Data

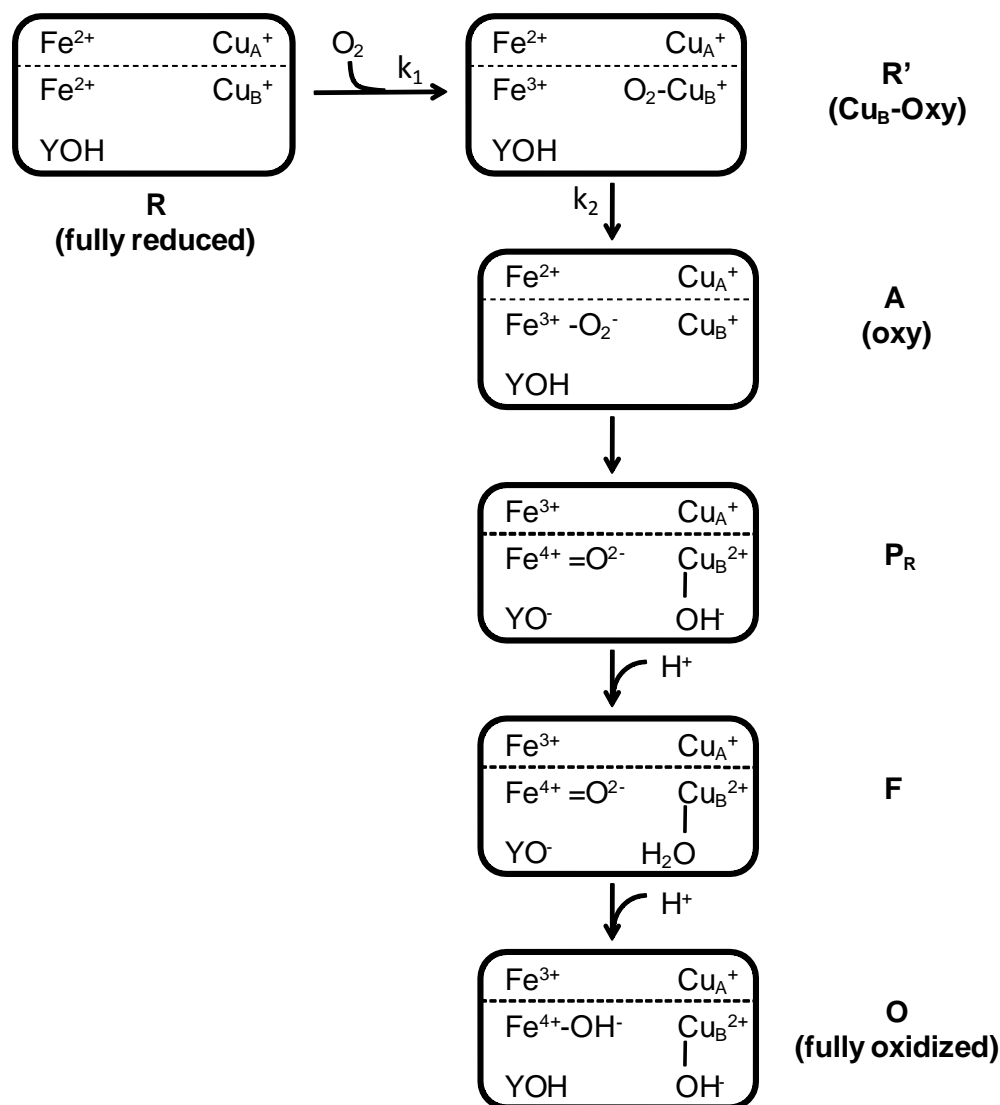

**Fig. S1: Proposed reaction scheme for the 4 electron reduction of dioxygen catalyzed by heme-copper oxidases.** The upper row in each rectangle represents the electron storage metal centers, Cu<sub>A</sub> and the iron corresponding to either heme *a* in the *aa*<sub>3</sub> oxidases or heme *b* in the *ba*<sub>3</sub>

protein. The lower row shows the  $\text{Cu}_B$ -heme  $a_3$  binuclear center together with the nearby tyrosine residue. In the case of the  $ba_3$  reaction, the structure of the intermediates may differ from those proposed for the  $aa_3$  oxidases shown here.

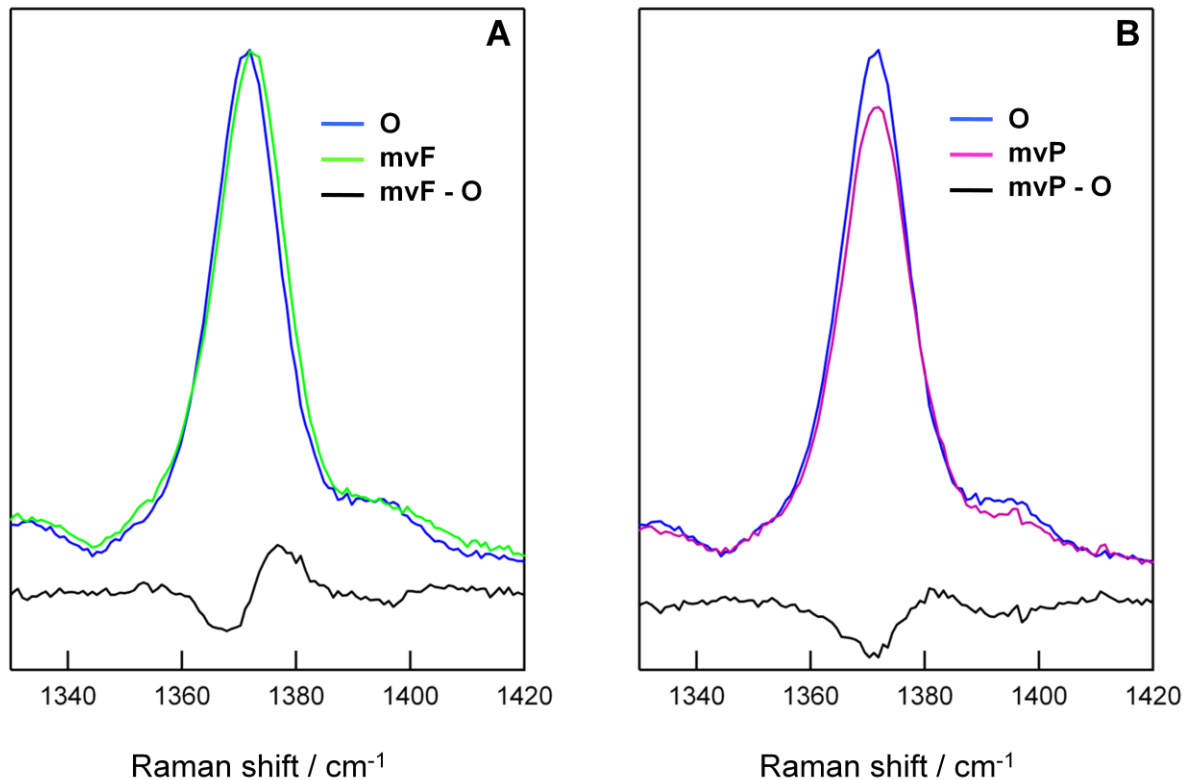

**Fig. S2.** A comparison of the  $\nu_4$  resonance Raman (RR) bands of bovine CcO from the oxidized state, **O**, the mixed valence **F** (mvF) and mixed valence **P** (mvP) states. In A the  $\nu_4$  resonance Raman bands of the **O** (blue trace) and the mvF (green trace) states are compared. The apparent frequency shift is small because both heme  $a$  and heme  $a_3$  contributed to the RR intensity. In both the **O** and mvF states, heme  $a$  is in its ferric oxidation state ( $a^{3+}$ ); therefore, the 1:1 subtraction between the recorded spectra yields a difference spectrum (black trace) that corresponds to the difference between the ferryl and the ferric derivatives of heme  $a_3$ . The derivative-like shape in the difference spectrum in the  $1370\text{ cm}^{-1}$  region demonstrates an up-shift of the  $\nu_4$  of heme  $a_3$  upon the conversion of the ferric to ferryl state. In B the  $\nu_4$  resonance Raman bands of the **O** (blue trace) and the mvP (red trace) states are compared and a result similar to that of mvF was obtained. These data serve as a reference for the analysis of the  $\nu_4$  RR bands of our  $ba_3$  samples to determine if a ferryl was formed in the reaction of the enzyme with  $\text{O}_2$ .

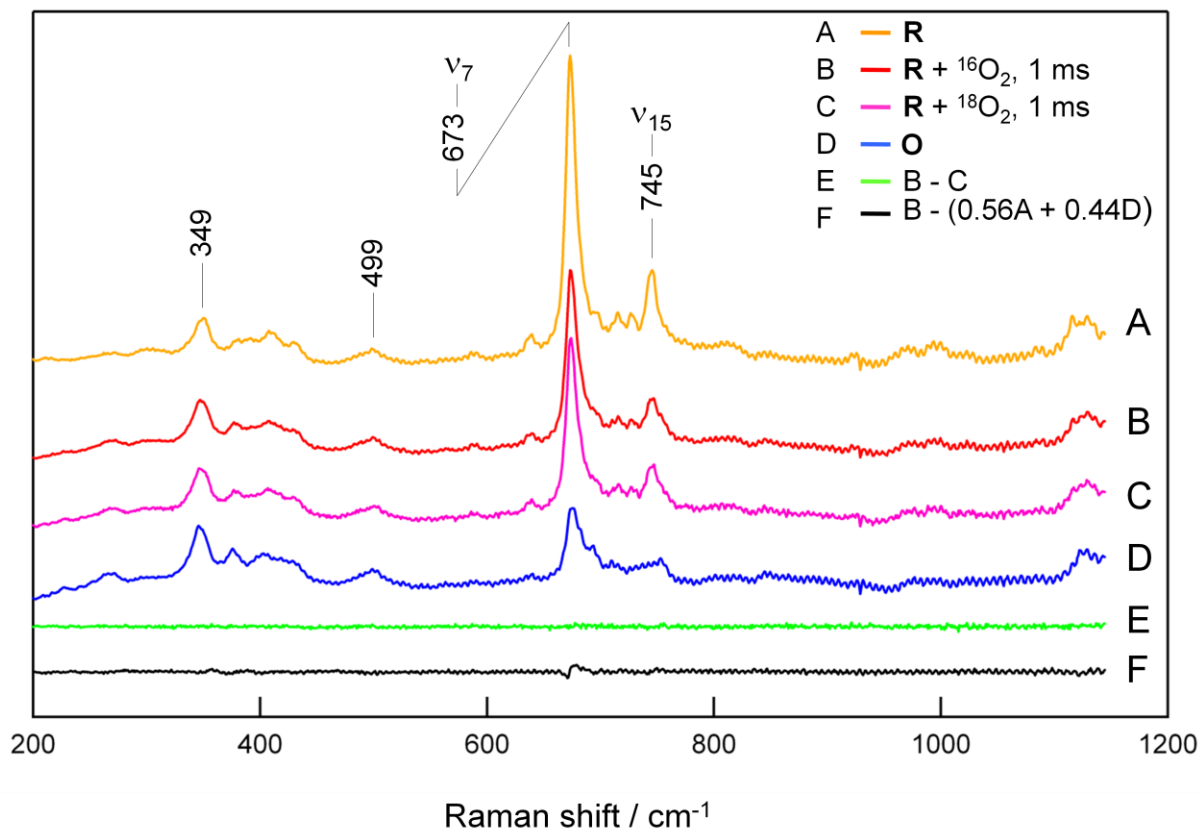

**Fig. S3. Low frequency RR spectra of the  $ba_3$  samples.** The RR spectra were measured for the **R** and **O** state  $ba_3$ , and for the reaction of **R** state  $ba_3$  with  ${}^{16}\text{O}_2$  and  ${}^{18}\text{O}_2$  at 1ms. All spectra were recorded for the samples in the continuous-flow cell. Differences among the spectra were calculated as indicated. The observed and difference spectra are on the same scale.
